# Supplementary material
Source: PubMed Central journal article supplement (PMC2875808)
Supplement: me.2009-0421_1.pdf [file me.2009-0421_1.pdf]

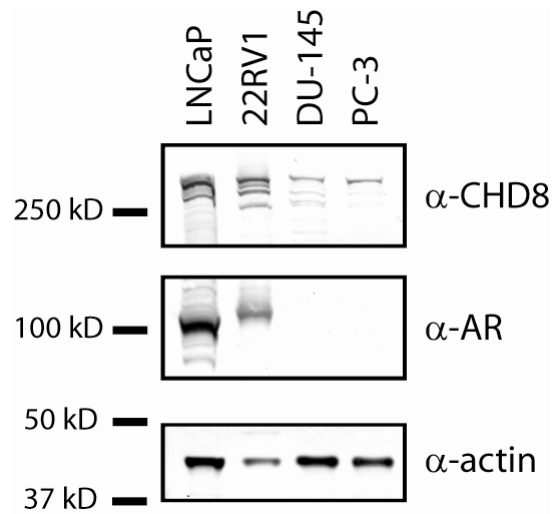

**FIG. S1.** Detection of endogenous CHD8 and AR in different PCa cell lines. Nuclear extracts were prepared from the indicated cell lines and were subjected to Western blot analysis using the indicated antibodies.

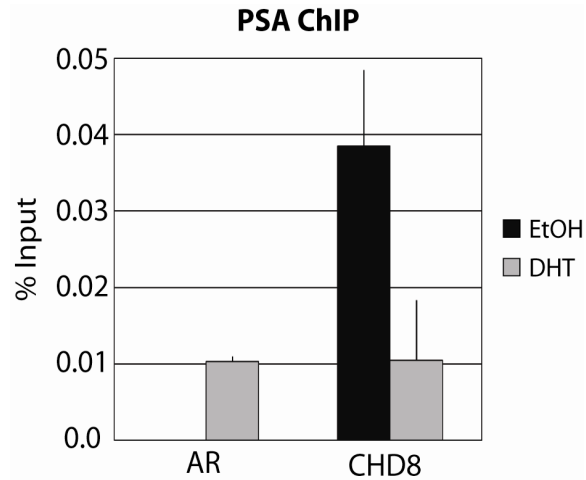

**FIG. S2.** Co-localization of CHD8 and AR to the ARE of the PSA promoter. LNCaP cells were treated with ethanol or 10 nM DHT for 6 hours and harvested for ChIP using antibodies to AR and CHD8. Immunoprecipitated chromatin was analyzed by qPCR using primers targeting the PSA ARE I/II region. Control ChIPs done with IgG antibodies were less than 0.005% of input and were therefore not shown.

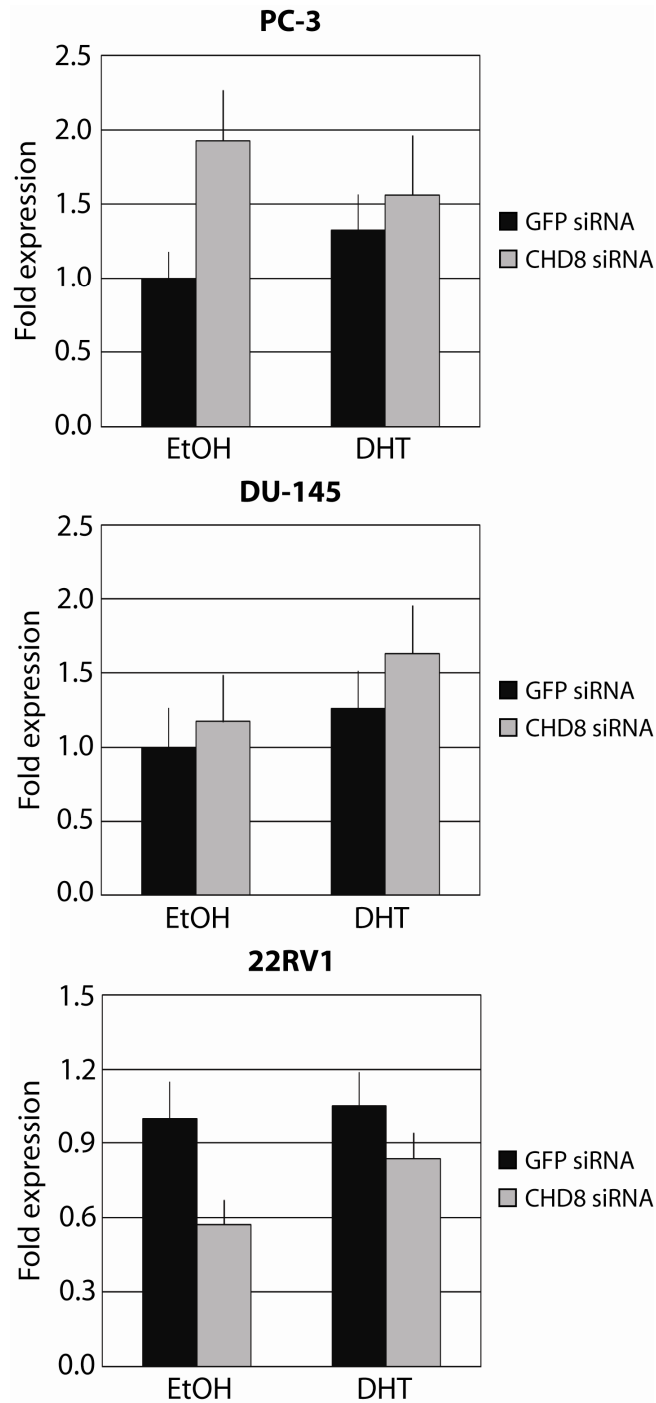

**FIG. S3.** Effect of CHD8 depletion on PSA expression in androgen-independent cell lines. The indicated androgen-independent cell lines were transfected with the specified siRNA constructs. Following selection of the transfected cells, cultures were treated with ethanol or 10 nM DHT for 6 hours. Total RNA was isolated and PSA expression was analyzed by quantitative RT-PCR.
